# Supplementary material
Source: PubMed Central journal article supplement (PMC10203965)
Supplement: jamainternmed-e230777-s001.pdf [file jamainternmed-e230777-s001.pdf]

## Data Sharing Statement

Jazowski. Time to Confirmatory Study Initiation After Accelerated Approval of Cancer and Noncancer Drugs in the US. *JAMA Intern Med.* Published May 22, 2023.  
doi:10.1001/jamainternmed.2023.0777

### Data

**Data available:** No
